# Supplementary material for: The Role of Ancestral Duplicated Genes in Adaptation to Growth on Lactate, a Non-Fermentable Carbon Source for the Yeast Saccharomyces cerevisiae
Source: MDPI journal article supplement (doi:10.3390/ijms222212293), 2021-11-14
Supplement: s1 [file s1]

**Supplementary Figure S1.**  
The role of ancestral duplicated genes in adaptation to growth on lactate, a non-fermentable carbon source for the yeast *Saccharomyces cerevisiae*  
Florian Mattenberger <sup>1,#,\$</sup>, Mario A. Fares<sup>1,2, ±</sup>, Christina Toft <sup>3,#,\*</sup> and Beatriz Sabater-Munoz <sup>1,\*</sup>

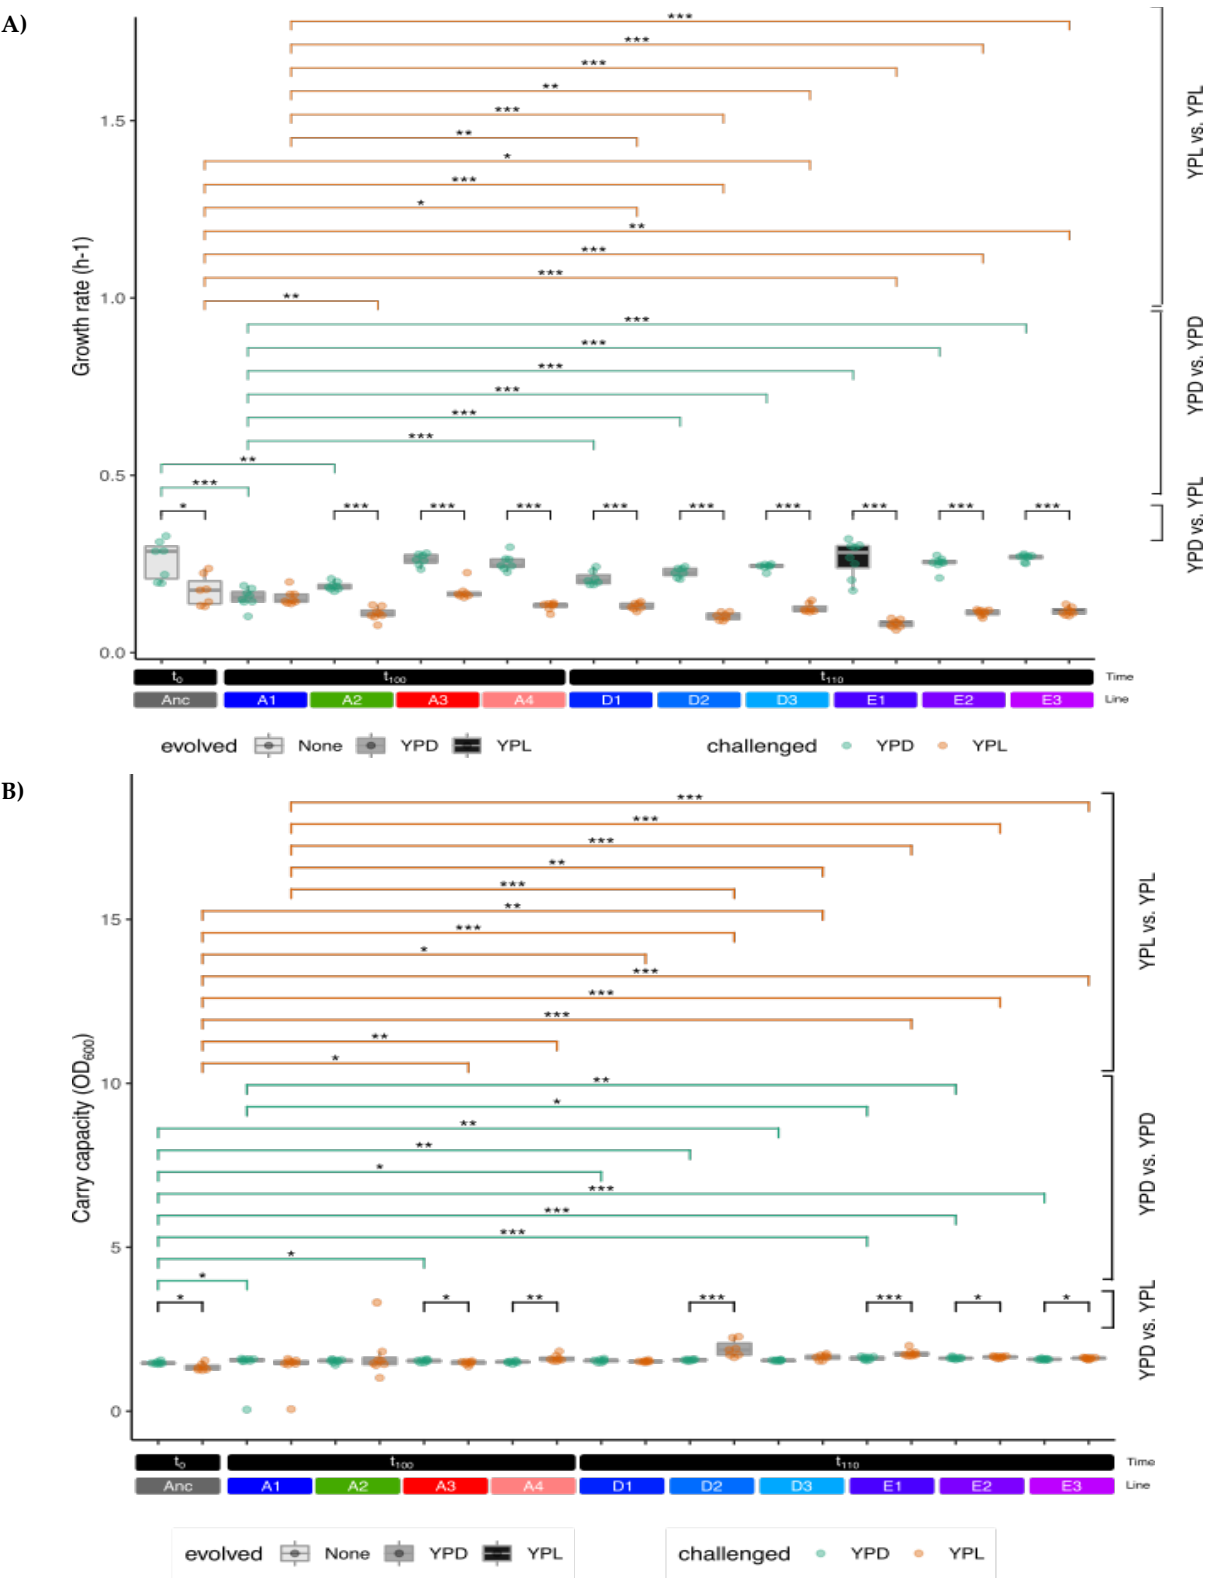

**Figure S1.** Growth parameters of *S. cerevisiae* Y06240 lines subjected to genetic diversification or to adaptive experimental evolution. A) Growth rate ( $h^{-1}$ ) per line and time point; B) Carrying capacity ( $k$ ,  $OD_{600}$ ) per line and time point.
